# Supplementary material
Source: Springer Nature journal article supplement (https://www.springermedizin.de/resource/supplementary/12967_2008_291_MOESM3_ESM.pdf/9576124)

**(A) TIL1520 binding to gp100 tetramer**

**TIL1520 Linearity of Dilution**

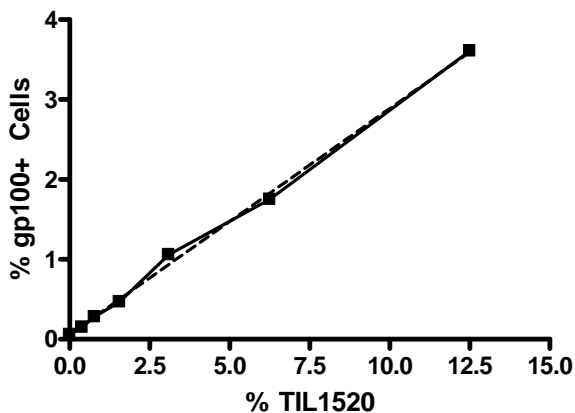

**(B) TIL1143 binding to MART-1 tetramer**

**TIL1143 Linearity of Dilution**

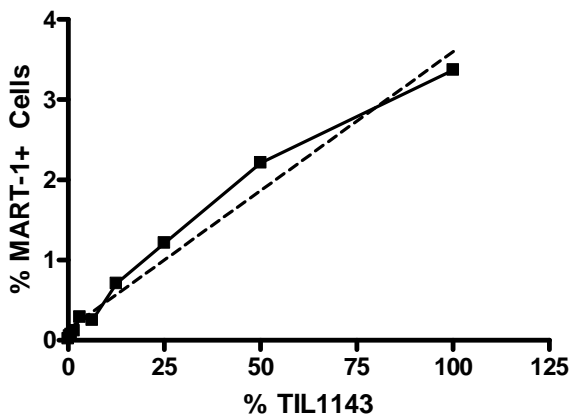

Supplement: MOESM3 [file 9576124]
